# Supplementary material for: Automatic CDR Estimation for Early Glaucoma Diagnosis
Source: Hindawi journal article supplement (doi:10.1155/2017/5953621), 2017-01-01
Supplement: f1 [file 5953621.f1.pdf]

| Real Name              | Dataset         |
|------------------------|-----------------|
| 01_g                   | HRF             |
| 07_g                   | HRF             |
| 07_h                   | HRF             |
| 10_h                   | HRF             |
| 15_h                   | HRF             |
| 04_test                | DRIVE           |
| 13_test                | DRIVE           |
| 18_test                | DRIVE           |
| 20_test                | DRIVE           |
| aria_a_21_7            | Aria            |
| aria_a_37_5            | Aria            |
| aria_a_9_43            | Aria            |
| aria_d_16_21           | Aria            |
| im0059                 | STARE           |
| im0073                 | STARE           |
| im0116                 | STARE           |
| im0118                 | STARE           |
| im0298                 | STARE           |
| imag53                 | MED             |
| imag54                 | MED             |
| imag61                 | MED             |
| imag439                | MED             |
| imag444                | MED             |
| imag611                | MED             |
| imag612                | MED             |
| imag641                | MED             |
| imag980                | MED             |
| imag1013               | MED             |
| imag1122               | MED             |
| imag1144               | MED             |
| imag1754               | MED             |
| imag1790               | MED             |
| imag2747               | MED             |
| image007               | DIARETDB0       |
| image018               | DIARETDB0       |
| image032               | DIARETDB0       |
| image041               | DIARETDB1       |
| image048               | DIARETDB1       |
| image049               | DIARETDB1       |
| image054               | DIARETDB1       |
| image061               | DIARETDB1       |
| image073               | DIARETDB1       |
| 20051214_42133_0100_PP | Messidor Base12 |
| 20051214_51701_0100_PP | Messidor Base12 |
| 20051214_51733_0100_PP | Messidor Base12 |
| 20051214_52242_0100_PP | Messidor Base12 |
| 20051214_56269_0100_PP | Messidor Base12 |
| 20060523_45369_0100_PP | Messidor Base13 |
| 20060523_45389_0100_PP | Messidor Base13 |
| 20060529_56039_0100_PP | Messidor Base14 |
| 20060529_56563_0100_PP | Messidor Base14 |
| 20060529_56834_0100_PP | Messidor Base14 |
| 20060529_57030_0100_PP | Messidor Base14 |
| 20060529_57063_0100_PP | Messidor Base14 |
| 20060529_57261_0100_PP | Messidor Base14 |
| 20060530_53617_0100_PP | Messidor Base14 |
| 20060407_45932_0200_PP | Messidor Base22 |
| 20051020_44923_0100_PP | Messidor2       |
| 20051020_55701_0100_PP | Messidor2       |
| 20051020_64653_0100_PP | Messidor2       |
